# Supplementary material for: UBA6 and NDFIP1 regulate the degradation of ferroportin
Source: PubMed Central journal article supplement — Haematologica. 2021 Jul 29;107(2):478–88. doi: 10.3324/haematol.2021.278530 (PMC8804582; doi:10.3324/haematol.2021.278530), 2021-07-29

## UBA6 and NDFIP1 regulate the degradation of ferroportin

Lisa Traeger,<sup>1</sup> Steffen B. Wiegand,<sup>1</sup> Andrew J. Sauer,<sup>1</sup> Benjamin H.P. Corman,<sup>1</sup> Kathryn M. Peneyra,<sup>1</sup> Florian Wunderer,<sup>1,2</sup> Anna Fischbach,<sup>1</sup> Aranya Bagchi,<sup>1</sup> Rajeev Malhotra,<sup>3</sup> Warren M. Zapol<sup>1</sup> and Donald B. Bloch<sup>1,4</sup>

<sup>1</sup>Anesthesia Center for Critical Care Research of the Department of Anesthesia, Critical Care and Pain Medicine, Massachusetts General Hospital and Harvard Medical School, Boston, MA, USA; <sup>2</sup>Department of Anesthesiology, Intensive Care Medicine and Pain Therapy, University Hospital Frankfurt, Goethe University, Frankfurt, Germany; <sup>3</sup>Cardiovascular Research Center and the Cardiology Division of the Department of Medicine, Massachusetts General Hospital and Harvard Medical School, Boston, MA, USA and <sup>4</sup>Division of Rheumatology, Allergy and Immunology of the Department of Medicine, Massachusetts General Hospital and Harvard Medical School, Boston, MA, USA

©2022 Ferrata Storti Foundation. This is an open-access paper. doi:10.3324/haematol.2021.278530

Received: February 6, 2021.

Accepted: July 22, 2021.

Pre-published: July 29, 2021

Correspondence: DONALD B. BLOCH - dbloch@mgh.harvard.edu

LISA TRAEGER - email@lisatraeger.de

## Supplemental Material and Methods

### Methods

#### *siRNA screen*

The day before siRNA transfection, cells were seeded in 8-well tissue culture slides in full growth medium without antibiotics to obtain a confluence of 30-50% on the day of transfection. The siRNA-library *Human Ubiquitin Conjugation Subset 1* (siGENOME® SMART pool® siRNA library G005615 Lot11132, which contains a mixture of four different siRNAs targeting each gene), as well as additional individual siRNAs directed against specific components of the ubiquitin pathway, were obtained from Dharmacon (Lafayette, CO, USA) (Supplemental Table 1). siRNA was transfected into cells using Dharmafect transfection reagent 4 (Dharmacon) according to the manufacturer's instructions. Cells were transfected using a final concentration of 20nM siRNA. Twenty-four hours after transfection, cells were washed, incubated with EMEM with 0.1% FBS and expression of FPN-GFP was induced by the addition of doxycycline for 16-18h. The following day, BMP6 (10ng/ml) or hepcidin (4ng/ml) or vehicle alone was added, and the cells were incubated for an additional 18h. To prepare protein extracts for immunoblot, cells were seeded and transfected in 6-well plates.

#### *Immunofluorescence*

Cells were fixed with 2% PFA for 10 min and permeabilized with methanol containing 4',6-Diamidin-2-phenylindol (DAPI) (0.5µM) for 7 min. Cells were stained with an antibody directed against GFP (Roche 11814460001, 1:250) for one hour at RT, followed by Alexa-488 conjugated donkey-anti-mouse antibody (Jackson ImmunoResearch, Cat. No 715545150; 1:250) for one hour. Cells were visualized using a Nikon Eclipse 80i (Nikon Instruments, Melville, NY, USA) microscope and the program Retiga 2000R, QIMAGING (Surrey, BC, Canada).

### *Immunoblot analysis*

Cells were lysed in RIPA buffer supplemented with a protease and phosphatase inhibitor cocktail (Thermo Fisher Scientific). Plasma enriched membrane proteins were prepared from liver using the Mem-PER™ Cell lysate kit (Thermo Fisher Scientific). Samples were prepared in Laemmli buffer without reducing agent and incubated for 30 min at RT<sup>1</sup>. Proteins were separated by SDS-Page, transferred to PDVF membranes, and incubated with primary antibodies overnight. Immunoblots were incubated with fluorescent dye-labeled secondary antibodies and imaged using the LI-COR Odyssey detection system (LI-COR, Lincoln, NE, USA). All of the antibodies used in this study are listed in supplemental table 2.

### *Quantitative Real-Time PCR*

Total RNA was extracted using Trizol (Qiagen, Germantown, MD, USA) according to the manufacturer's instructions. Complementary DNA was synthesized using MultiScribe Reverse Transcriptase (Applied Biosystems, Foster City, CA, USA). Quantitative Real-Time PCR was performed on the Mastercycler Replex (Eppendorf, Hamburg, Germany) using TaqMan Fast Advanced Master Mix (Applied Biosystems). Target gene expression was normalized to levels of 18S ribosomal RNA and calculated using the relative C<sub>T</sub> method<sup>2</sup>. TaqMan probes that were used for qPCR are listed in supplemental table 3.

### *Hepcidin and Iron analysis*

Hepcidin levels were determined using the Hepcidin-25 HS Elisa Kit (DRG International, Inc.; Springfield, NJ, USA) according to the manufacturer's instructions. Serum iron levels were measured using the Iron-SL kit (Seksui Diagnostics, Lexington, MA, USA) according to the manufacturer's instructions.

## Material

**Supplemental Table 1. List of siRNAs directed against components of the ubiquitin pathway.**

| Initial E2/E3 Screen |                |
|----------------------|----------------|
| Gene Symbol          | Gene Accession |
| UBE2C                | NM_181803      |
| UBR5                 | NM_015902      |
| UBE2K                | NM_001111113   |
| HECTD1               | NM_015382      |
| UBE2T                | NM_014176      |
| CDC34                | NM_004359      |
| C12orf51             | NM_001109662   |
| DCUN1D1              | NM_020640      |
| CUL2                 | NM_003591      |
| HERC3                | NM_014606      |
| UBE2W                | NM_018299      |
| UBE2V2               | NM_003350      |
| DCUN1D5              | NM_032299      |
| HERC2                | NM_004667      |
| UBE2N                | NM_003348      |
| UBE2Z                | NM_023079      |
| UBE2L3               | NM_003347      |
| HERC5                | NM_016323      |
| UBE2NL               | NM_001012989   |
| DCUN1D3              | NM_173475      |
| BIRC6                | NM_016252      |
| UBE2J2               | NM_194457      |
| UBA7                 | NM_003335      |
| HERC1                | NM_003922      |
| HACE1                | NM_020771      |
| CUL7                 | NM_014780      |
| UBE2S                | NM_014501      |
| CUL3                 | NM_003590      |
| HUWE1                | NM_031407      |
| CAND2                | NM_012298      |
| UBE2D3               | NM_181893      |

| HECT E3 Screen |                |
|----------------|----------------|
| Gene Symbol    | Gene Accession |
| SMURF1         | NM_181349      |
| ITCH           | NM_031483      |
| NEDD4          | NM_006154      |
| WWP1           | NM_007013      |
| SMURF2         | NM_022739      |
| NEDD4L         | NM_015277      |
| HECW2          | NM_020760      |
| HECW1          | NM_015052      |
| WWP2           | NM_001270453   |

|                    |              |
|--------------------|--------------|
| UBA5               | NM_198329    |
| UBE2M              | NM_003969    |
| UEVLD              | NM_018314    |
| UBE2F              | NM_080678    |
| DCUN1D2            | NM_001014283 |
| CUL1               | NM_003592    |
| UBE3B              | NM_130466    |
| UBE2A              | NM_003336    |
| UBE2E2             | NM_152653    |
| HECTD3             | NM_024602    |
| UBE2I              | NM_003345    |
| UBE2Q2             | NM_173469    |
| HERC6              | NM_017912    |
| UBE2O              | NM_022066    |
| UBE2V1             | NM_001032288 |
| UBE2R2             | NM_017811    |
| AKTIP              | NM_022476    |
| UBE2E1             | NM_003341    |
| UBE3C              | NM_014671    |
| TSG101             | NM_006292    |
| UBE2G2             | NM_003343    |
| UBA3               | NM_003968    |
| UBE2E3             | NM_006357    |
| UBE2D1             | NM_003338    |
| UBE3A              | NM_000462    |
| TRIP12             | NM_004238    |
| HECTD2             | NM_173497    |
| CUL4A              | NM_003589    |
| HERC4              | NM_015601    |
| UBE2B              | NM_003337    |
| UBE2U              | NM_152489    |
| TMEM189-<br>UBE2V1 | NM_003349    |
| CAND1              | NM_018448    |
| KIAA0317           | NM_001039479 |
| UBE2D4             | NM_015983    |
| DCUN1D4            | NM_015115    |
| CUL4B              | NM_001079872 |
| UBE2L6             | NM_004223    |

|         |           |
|---------|-----------|
| UBE2J1  | NM_016021 |
| UBE2QL1 | XM_940609 |
| UBE2Q1  | NM_017582 |
| UBE2G1  | NM_003342 |
| UBE2H   | NM_182697 |
| CUL5    | NM_003478 |
| ARIH1   | NM_005744 |
| UBE2D2  | NM_003339 |
| CACUL1  | NM_153810 |
| NDFIP1  | NM_030571 |

**Supplemental Table 2. List of Antibodies**

| Name                         | Company                                 | Catalog No. | Dilution |
|------------------------------|-----------------------------------------|-------------|----------|
| Mouse-anti-GFP               | Roche                                   | 1181446000  | 1:1000   |
| Rabbit-anti-FPN              | Novus                                   | NBP1-21502  | 1:1000   |
| Rabbit-anti-Ferritin H-chain | Santa-Cruz                              | sc25617     | 1:1000   |
| Rabbit-anti pSMAD1/5/8       | Maine Medical Center Research Institute | VI131       | 1:1000   |
| Rabbit-anti GAPDH            | Cell Signaling                          | D16H11      | 1:2500   |
| Rabbit-anti-NDFIP1           | Abcam                                   | ab236892    | 1:1000   |

**Supplemental Table 3. List of qPCR TaqMan Probes**

|                                                  |               |
|--------------------------------------------------|---------------|
| Human S18 TaqMan gene expression assay           | Hs99999901_s1 |
| Human UBA1 TaqMan gene expression assay          | Hs01031318_m1 |
| Human UBA6 TaqMan gene expression assay          | Hs00414964_m1 |
| Human NDFIP1 TaqMan gene expression assay        | Hs00228968_m1 |
| Human ARIH1 TaqMan gene expression assay         | Hs00194934_m1 |
| Human HAMP TaqMan gene expression assay          | Hs00221783_m1 |
| Human ID1 TaqMan gene expression assay           | Hs03676575_s1 |
| Mouse S18 TaqMan gene expression assay           | Mm03928990_g1 |
| Mouse Ndfip1 TaqMan gene expression assay        | Mm01258331_m1 |
| Mouse Hamp TaqMan gene expression assay          | Mm04231240_s1 |
| Mouse Slc40a1 (Fpn) TaqMan gene expression assay | Mm00489837_m1 |

## Supplemental Figure

**Supplemental Figure 1. (A)** Treatment of HepG2 FPN-GFP cells with Dox reduced the level of intracellular ferritin heavy-chain (FTH1), consistent with increased iron export in cells expressing FPN-GFP. GAPDH was used as a loading control. **(B)** Images of untreated HepG2 cells, and cells treated with doxycycline (Dox; 2  $\mu$ g/ml) alone, with Dox followed by BMP6 (10 ng/ml) for 18 h and with Dox followed by chloroquine (100  $\mu$ M) and BMP6 (10 ng/ml) for 18h are shown.

**Supplemental Figure 2. (A)** The ratio of FPN levels in cells treated with Dox in the presence and absence of BMP6 was determined. The FPN protein ratio (Dox treatment/Dox+BMP6 treatment) was lower in siUBA6-treated cells compared to siControl- or siUBA1-treated cells (\*\*=P<0.01, One-Way ANOVA; N=3). **(B)** UBA6 was successfully depleted using siUBA6, despite the presence of exogenous BMP6, as determined by qPCR (mRNA expression relative to control; \*=P<0.05; Student's t-test). **(C)** HepG2-FPN-GFP cells were transfected with siControl-, siUBA6-, siNDFIP1 or siARIH1 and incubated in the presence of hepcidin (4 ng/ml for 18 h). siRNA directed against UBA6 and NDFIP1, but not ARIH1, prevented hepcidin-induced degradation of the FPN-GFP fusion protein, as determined by immunoblot. GAPDH was used as a loading control.

**Supplemental Figure 3. (A)** Cells were transfected with siControl, siSMAD4, siUBE2E2, siUBE2J2, or siUBE2R2 and were treated with Dox or Dox followed by BMP6 (10 ng/ml for 18 h), as indicated. White bar indicates 100  $\mu$ m. **(B)** The levels of FPN-GFP in cells treated with Dox and siRNAs directed against UBE2E2, UBE2J2 or UBE2R2 in the presence of BMP6 (10ng/ml for 18h) are shown. In lane 1, HepG2 cells were not treated with Dox (negative control). siRNA directed against *HAMP* was used as a positive control for inhibition of BMP6-mediated degradation of FPN-GFP. GAPDH was used as a loading control **(C)** NDFIP1 was successfully depleted using siNDFIP1 despite the presence of exogenous BMP6, as determined by qPCR (mRNA expression relative to control; \*\*=P<0.01; Student's t-test). **(D)** The ratio of FPN levels in the

presence and absence of BMP6 (FPN protein ratio of Dox treatment/Dox+BMP6 treatment) was determined. The ratio is lower in siNDFIP1- treated cell compared to siControl- and siNDFIP2-treated cells (\*= $P<0.05$ , \*\*= $P<0.01$ , One-Way ANOVA; N=4).

**Supplemental Figure 4. (A)** Levels of FPN-GFP in cells treated with Dox and siRNAs directed against different HECT E3 ligases (SMURF1, SMURF2, HECW1, HECW2, WWP1, WWP2, NEDD4, NEDD4-2, ITCH) in the presence (+) or absence (-) of BMP6 (10ng/ml for 18h). In lane 1, HepG2 cells were not treated with Dox (negative control). siRNA directed against *SMAD4* was used as a positive control for inhibition of BMP6-mediated degradation of FPN-GFP. GAPDH was used as a loading control. **(B)** Levels of FPN-GFP in cells treated with Dox and siRNAs directed against different HECT E3 ligases in pairwise combination. Cells were treated with BMP6 (10ng/ml) for 18h. siRNAs directed against HECT E3 ligases in pairwise combinations did not prevent the degradation of FPN-GFP. GAPDH was used as a loading control. **(C)** ARIH1 was successfully depleted using siARIH1, despite the presence of BMP6, as determined by qPCR (mRNA expression relative to control; \*\*= $P<0.01$ ; Student's t-test). **(D)** The ratio of FPN levels with and without BMP6 was lower in siARIH1-treated cells compared to siControl- and siARIH2- treated cells (\*= $P<0.05$ , \*\*= $P<0.01$ , One-Way ANOVA; N=4).

**Supplemental Figure 5. (A)** In AAV2/8-treated mice, the levels of hepatic ferroportin were positively correlated with serum iron (Pearson Correlation:  $R=0.6773$ ;  $P=0.03$ ). **(B)** The level of ferritin light chain (FTL) in the liver of AAV2/8-sh*Ndfip1* treated mice was increased compared to AAV2/8-sh*Control*-treated mice as determined by immunoblot. GAPDH was used as a loading control. **(C)** Densitometric analysis of immunoblot in (B) (\*\*= $P<0.01$ , Student's t-test). **(D)** The mRNA expression of *Tfr1* in the liver of AAV2/8-sh*Ndfip1*-treated animals was reduced compared to AAV2/8-sh*Control*-treated mice (\*\*= $P<0.01$ , Student's t-test). **(E)** The level of splenic *Ndfip1* was similar in AAV2/8-sh*Control*- and AAV2/8-sh*Ndfip1*-treated animals, as determined by qPCR

## References

1. Canonne-Hergaux F, Donovan A, Delaby C, Wang H, Gros P. Comparative studies of duodenal and macrophage ferroportin proteins. *Am J Physiol Gastrointest Liver Physiol* 2006;290(1):G156-163.
2. Pfaffl MW. A new mathematical model for relative quantification in real-time RT-PCR. *Nucleic Acids Res* 2001;29(9):e45.

## Supplemental Figure 1

A

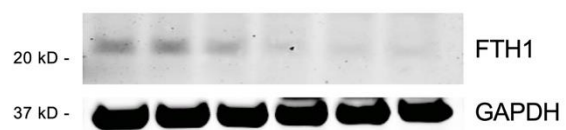

B

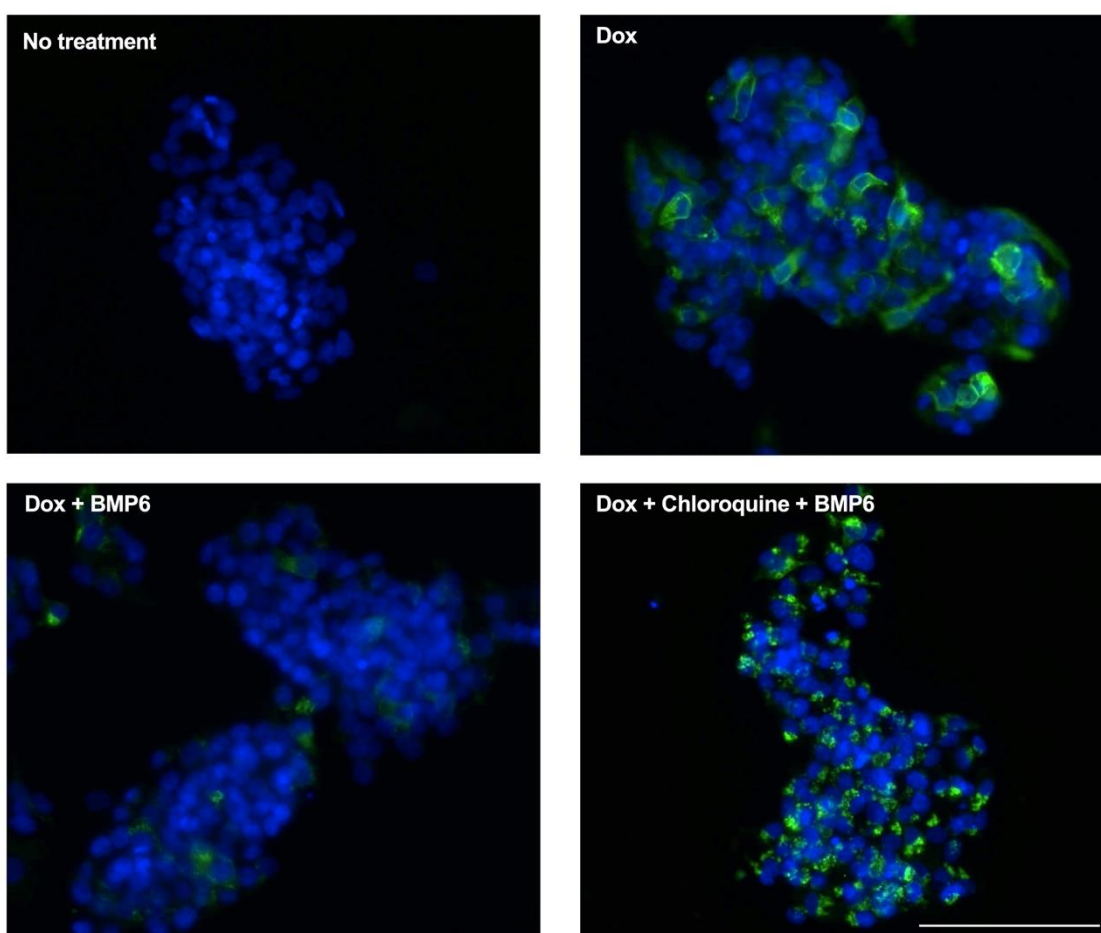

Supplemental Figure 2

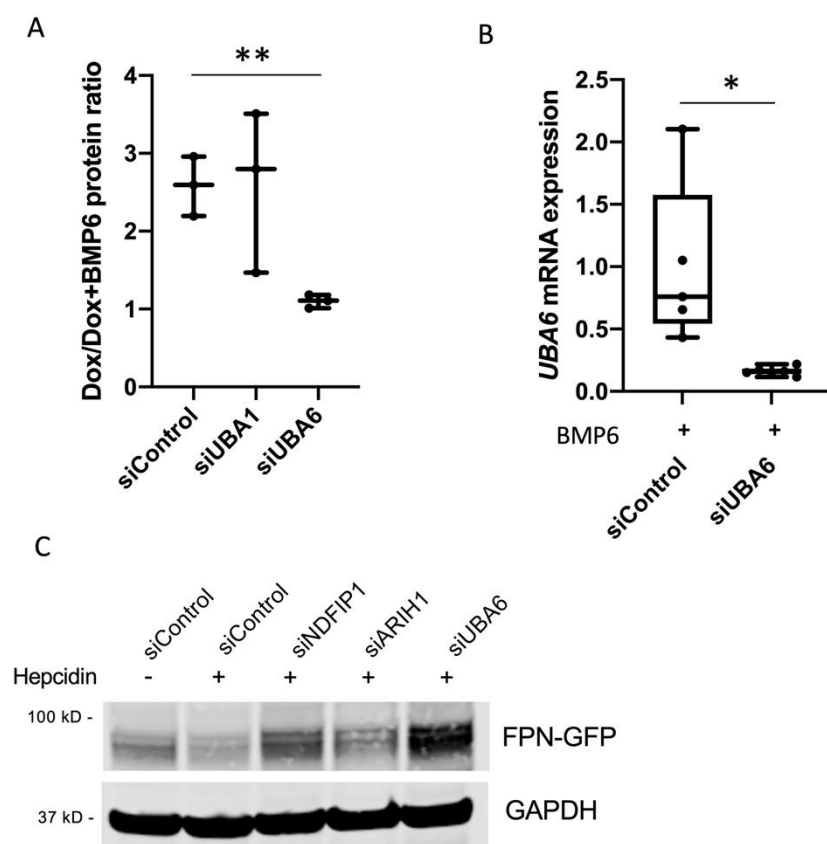

Supplemental Figure 3

A

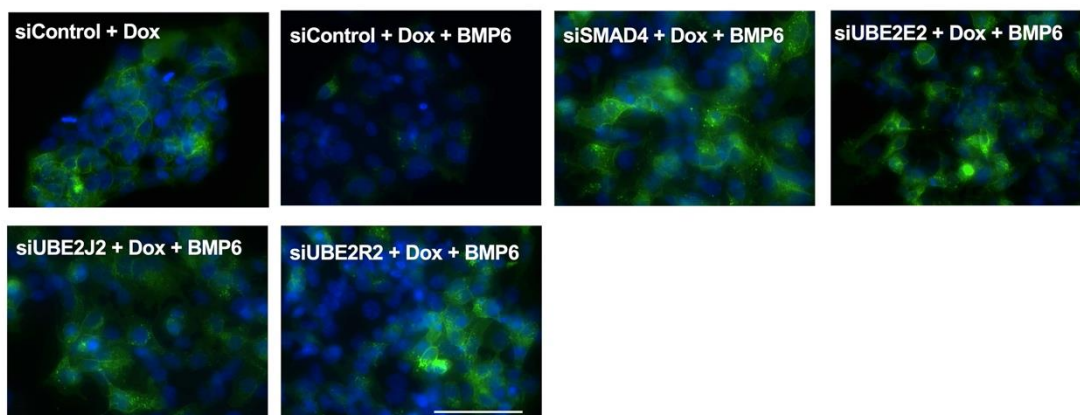

B

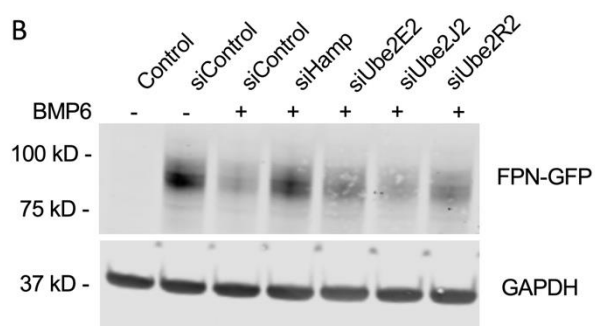

C

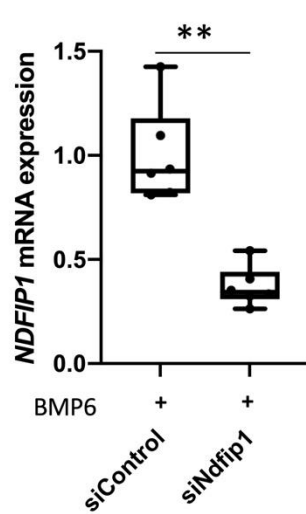

D

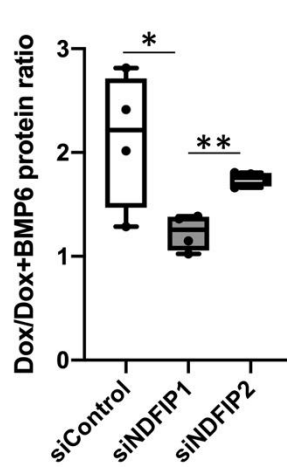

Supplemental Figure 4

A

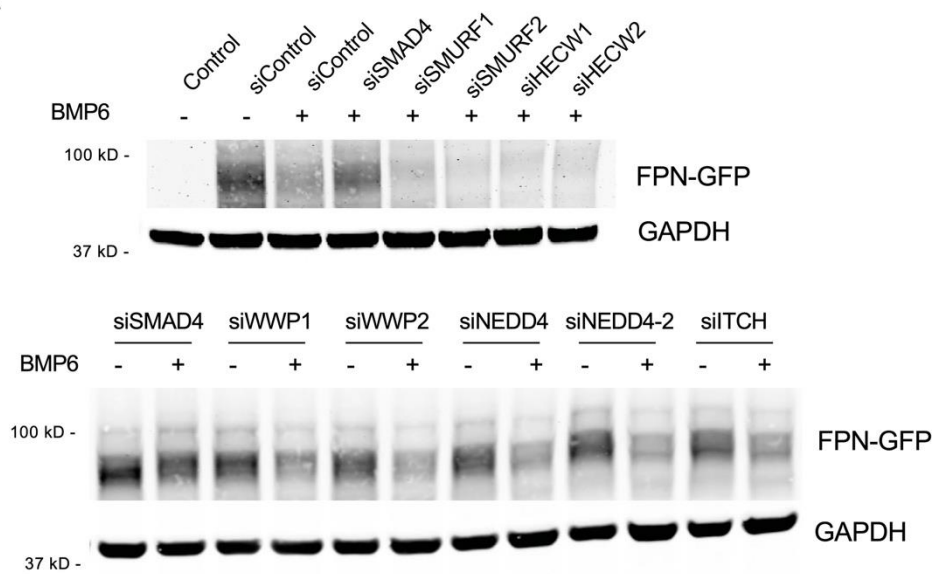

B

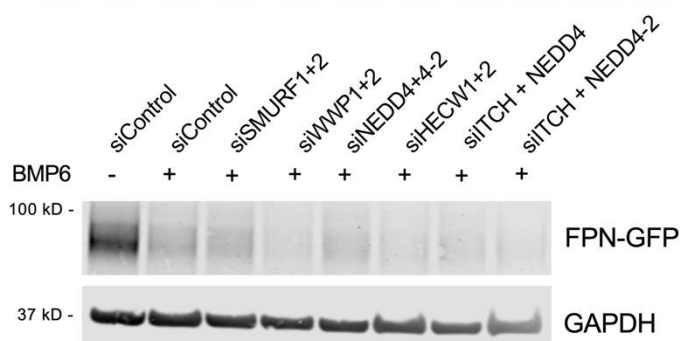

C

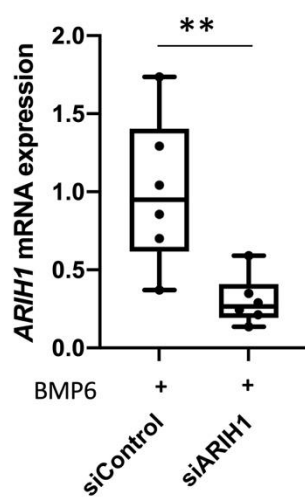

D

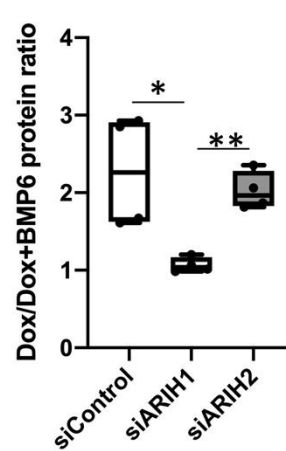

Supplemental Figure 5

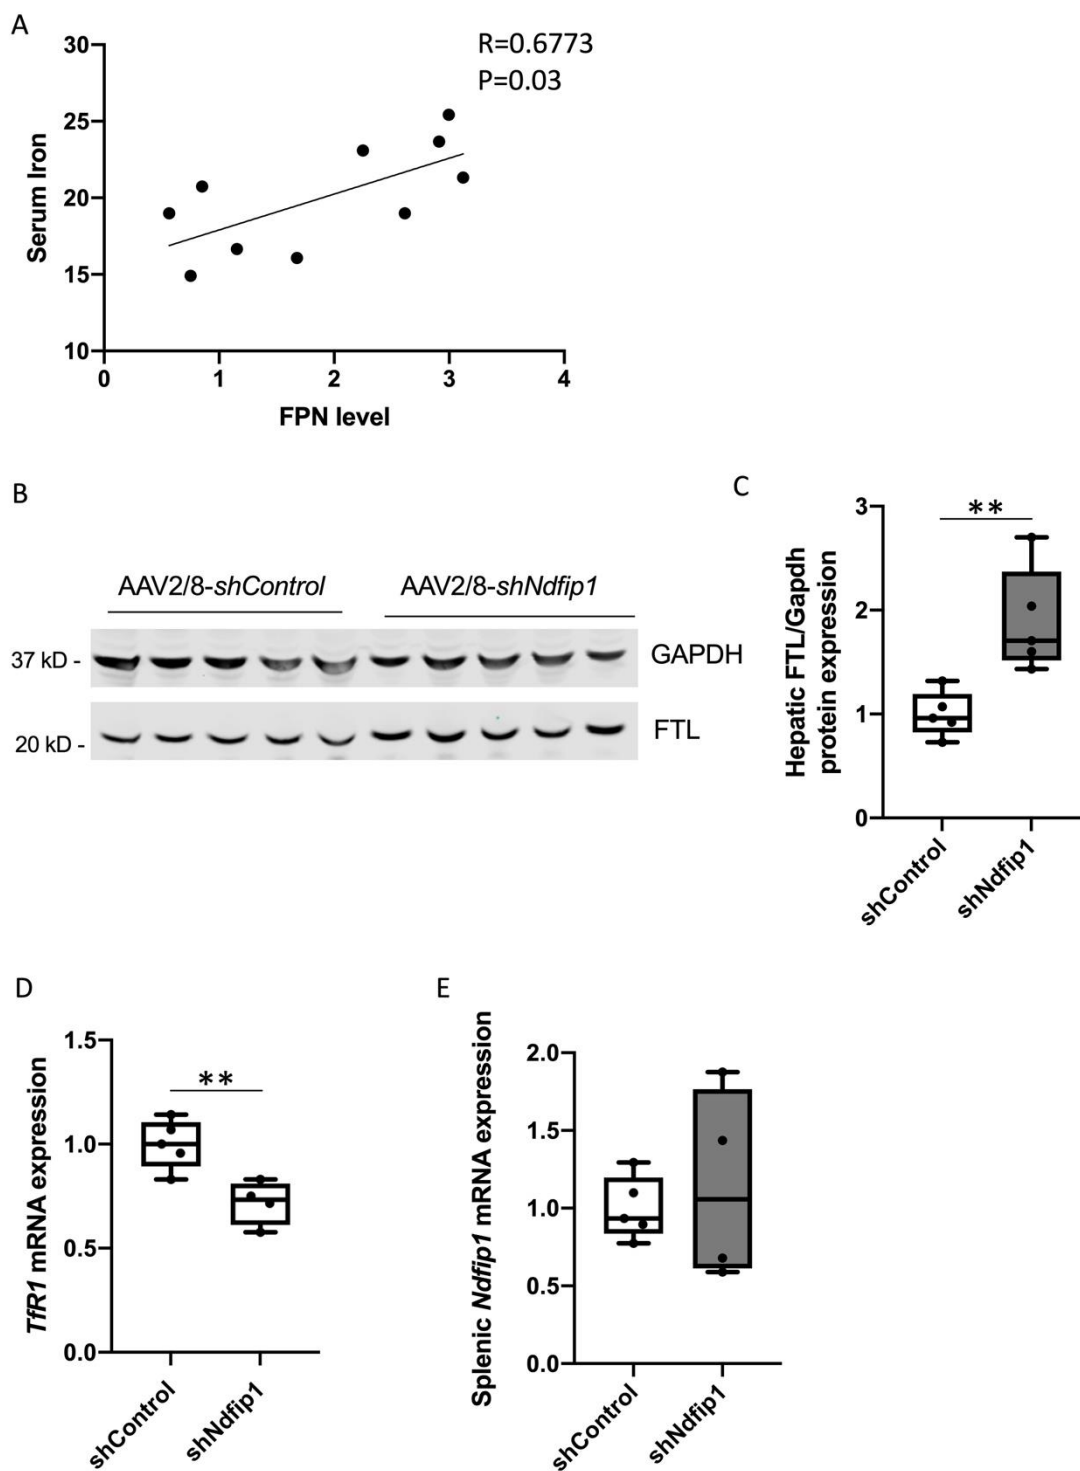

Supplement: 2021_278530_TRAEGER_SUPPL.pdf [file 2021_278530_TRAEGER_SUPPL.pdf]
